# Supplementary material
Source: PubMed Central journal article supplement (PMC8013013)
Supplement: 4162_table.pdf [file 4162_table.pdf]

**On-line Table: 4D-CTA in the diagnostic work-up of brain AVMs and dAVFs**

| Author                             | Pathology    | Study Type                                           | No. Subjects | Methods                                                                                               | Standard of Reference                       | No. of Readers        | Results                                                                                                                                                                                                                                                                                                                                                                                                                                                                                                                                                                                                                                                                                         | Discussion Points                                                                                                                                      |
|------------------------------------|--------------|------------------------------------------------------|--------------|-------------------------------------------------------------------------------------------------------|---------------------------------------------|-----------------------|-------------------------------------------------------------------------------------------------------------------------------------------------------------------------------------------------------------------------------------------------------------------------------------------------------------------------------------------------------------------------------------------------------------------------------------------------------------------------------------------------------------------------------------------------------------------------------------------------------------------------------------------------------------------------------------------------|--------------------------------------------------------------------------------------------------------------------------------------------------------|
| Wang et al 2014 <sup>26</sup>      | AVM          | Observational cohort study                           | 17           | Comparing 4D-CTA vs DSA in diagnosing bAVMs                                                           | DSA                                         | 2 Blinded independent | 4D-CTA had the same ability as DSA to distinguish the main feeding arteries in all cases; in addition, the diagnosis of draining veins in 4D-CTA successfully displayed all of the vessels found by DSA                                                                                                                                                                                                                                                                                                                                                                                                                                                                                         | In the identification of smaller and specific arterial branches, there were discrepancies between the 2 methods in 1 patient                           |
| Fujiwara et al 2013 <sup>29</sup>  | dAVF         | Observational cohort study                           | 29           | 4D-CTA and DSA studies were retrospectively analyzed and compared in diagnosing and classifying dAVFs | DSA                                         | 2                     | Diagnosis: 4D-CTA depicted 97% of dAVFs at the correct location<br>Classification: 4D-CTA correctly classified 94% according to the Cognard classification<br>Feeding arteries: compared with DSA, 52% of the feeding arteries were detected; this could be increased to 71% with volume-rendering superimposed on brain surface images and MIPs<br>4D-CTA correctly diagnosed and classified dAVFs in all 3 cases as confirmed with DSA                                                                                                                                                                                                                                                        | In the assessment of feeding arteries, the interobserver agreement and intermodality agreement were moderate ( $k = 0.498$ and $0.533$ , respectively) |
| Beijer et al 2013 <sup>33</sup>    | dAVF         | Descriptive case series                              | 3            | Descriptive case series of 3 cases comparing 4D-CTA vs DSA in diagnosing and classifying dAVFs        | DSA                                         | NA                    |                                                                                                                                                                                                                                                                                                                                                                                                                                                                                                                                                                                                                                                                                                 |                                                                                                                                                        |
| Yamaguchi et al 2013 <sup>34</sup> | Spinal dAVF  | Descriptive case series                              | 4            | Descriptive case series of 4 cases comparing 4D-CTA vs DSA in diagnosing and classifying spinal AVFs  | DSA and time-resolved contrast-enhanced MRA | 2 Nonblinded          | 4D-CTA could detect the following:<br>1) All perimedullary draining veins<br>2) Location of dAVFs in 3 of 4 cases<br>3) Direction of flow in all cases<br>4D-CTA diagnosed all bAVMs and misclassified only 1 bAVM according to the Spetzler-Martin grade<br>In 10 cases, full agreement between DSA and 4D-CTA regarding diagnosis and Borden classification; in 1 patient, a slow-filling dAVF was missed with 4D-CTA<br>4D-CTA followed up a benign dAVF in case 1, recognized cortical reflux in case 2, and visualized a small AVM with equivocal planar imaging findings in case 3<br>The assumption is made that 4D-CTA will be helpful in the diagnosis and follow-up of AVMs and dAVFs | High effective radiation dose was reported of >40 mSv                                                                                                  |
| Willems et al 2012 <sup>27</sup>   | AVM          | Observational cohort study                           | 17           | Comparing 4D-CTA vs DSA in diagnosing and classifying brain AVMs                                      | DSA                                         | 3 Blinded             |                                                                                                                                                                                                                                                                                                                                                                                                                                                                                                                                                                                                                                                                                                 | With 4D-CTA, deep venous drainage was missed in 1 patient                                                                                              |
| Willems et al 2011 <sup>32</sup>   | dAVF         | Observational cohort study                           | 11           | Comparing 4D-CTA vs DSA in diagnosing and classifying dAVFs                                           | DSA                                         | 2 Blinded             |                                                                                                                                                                                                                                                                                                                                                                                                                                                                                                                                                                                                                                                                                                 |                                                                                                                                                        |
| Brouwer et al 2010 <sup>30</sup>   | AVM and dAVF | Descriptive case series                              | 3            | Comparing 4D-CTA vs DSA in diagnosing and classifying dAVFs and AVMs                                  | DSA                                         | NA                    |                                                                                                                                                                                                                                                                                                                                                                                                                                                                                                                                                                                                                                                                                                 | In case 2, DSA elucidated the angioarchitecture of the complex lesion in much more detail; however, this did not have clinical consequences            |
| Salomon et al 2009 <sup>31</sup>   | AVM and dAVF | Author description of initial experience with 4D-CTA | NA           | NA                                                                                                    | NA                                          | NA                    |                                                                                                                                                                                                                                                                                                                                                                                                                                                                                                                                                                                                                                                                                                 |                                                                                                                                                        |

**Note:**—NA indicates not applicable; bAVM, brain arteriovenous malformation.
